# Supplementary material
Source: PubMed Central journal article supplement (PMC5206545)
Supplement: pnas.1616343114.sapp.pdf [file pnas.1616343114.sapp.pdf]

## SUPPORTING INFORMATION

### SI MATERIALS AND METHODS

#### ***In vitro* enrichment assay**

Target site oligonucleotides containing a randomized 12 bp spacer in the context of a *td* target site were cloned into the pSP72 vector as previously described to create pSP72-N12 (1). MegaTev purification was performed as previously described (2). Cleavage assays were performed with 360 nM or 1100 nM purified MegaTev and 10 nM pSP72-N15 plasmid in cleavage buffer (50 mM Tris-HCl pH 7.9, 300 mM NaCl, 10 mM MgCl<sub>2</sub> and 1 mM dithiothreitol (DTT)) at 37°C for 5 min. Subsequent rounds of enrichment was performed as previously described (1). Samples were prepared for Illumina sequencing at the London Regional Genomics Centre by PCR amplification of target site from both the input and round 3 enrichment samples using Phusion polymerase (New England Biolabs) with barcoded primers. Custom Perl scripts were used to separate the reads by barcode and to extract the randomized region. Enrichment was determined by using the center logarithmic transformation of the nucleotide counts (3), and by taking the difference between the enriched and input values per nucleotide per position.

#### **Bacterial two-plasmid selection**

The bacterial two-plasmid selection was performed with single MegaTev constructs or with MegaTev linker libraries as previously described (2, 4). Briefly, 50 ng of MegaTev pEndo vector was transformed into *E. coli* BW25141 cells harbouring the pTox plasmid containing the target site of choice. Cells were recovered at 37 °C for 1.5 hrs and aliquots plated on selective (LB media plus 25 µg/ml chloramphenicol and 10 mM L-(+)-arabinose) and non-selective plates (LB media plus 25 µg/ml chloramphenicol, 50 µg/ml kanamycin and 0.2% glucose). Survival was expressed as the ratio of the number of colonies on the selective plate versus the number of colonies on the non-selective plate. The MegaTev mutant linker libraries were screened either on solid media, or in liquid LB media under selective and non-selective conditions. Identified MegaTev linker variants were re-cloned into pEndo and the selection repeated on the appropriate target sites.

#### **TevCas9 site prediction**

The TevCas9 binding model included two components essential for I-TevI activity: a 5'-CNNNG-3' cleavage motif, and a DNA spacer. Putative TevCas9 binding sites were found using custom Perl scripts that windowed across human coding regions for 5'-CNNNG-3 motifs followed by a DNA spacer of 15-18 bps. The raw score of the putative binding site was calculated by: (1) the log<sub>2</sub> value of the activity of the 5'-CNNNG-3' cleavage motif (relative to the 5'-CAACG-3' native motif); (2) the log<sub>2</sub> score of the DNA spacer length, and given scores 18 bp = 0.6; 17 bp = 1; 16 bp = 0.6; 15 bp = 0.4; 14 bp = 0; (3) the log<sub>2</sub> score of the fit of the DNA spacer sequence to the position weight matrix (PWM) derived from the DNA spacer *in vitro* enrichment data. The predicted binding sites were subsequently ranked by their Z score. The gRNA portion of highly ranked TevCas9 sites were individually examined using the CRISPR Design website (5), and TevCas9 sites that included poor gRNAs were excluded. Predicted sites are available in Dataset S2.

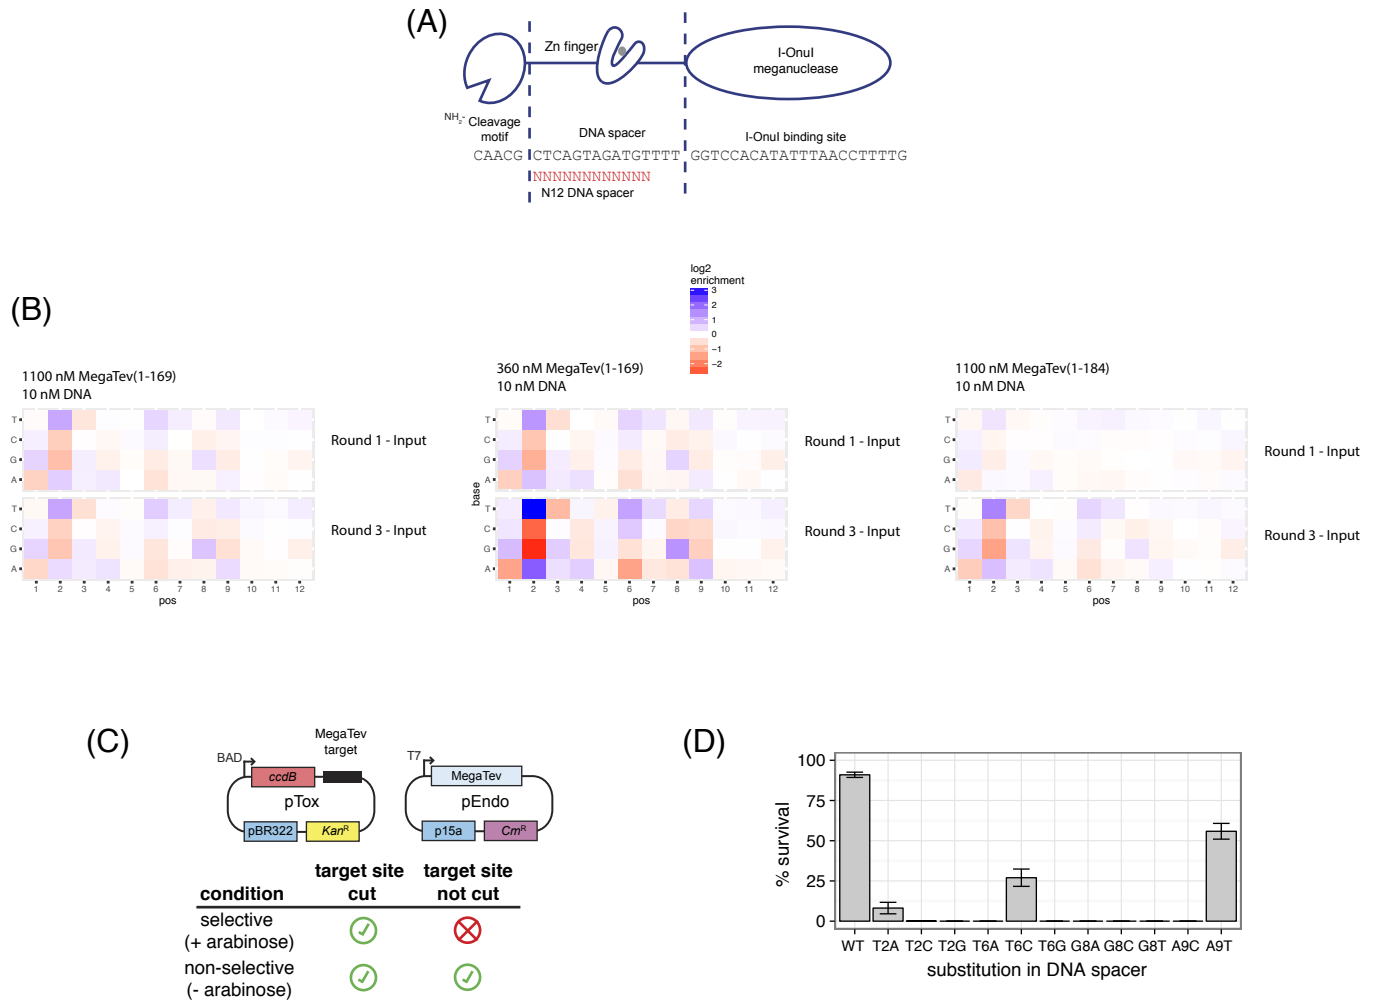

**Fig. S1.** (A) Schematic of MegaTev construct used to profile nucleotide preference in the DNA spacer region, with the N12 randomized region indicated. (B) *In vitro* enrichment of N12 DNA spacer library with the MegaTev(1-169) or MegaTev(1-184) constructs under different reaction conditions. Nucleotide preference in the DNA spacer region is displayed as proportional  $\log_2$  enrichment of each nucleotide at each position relative to the abundance in the input pool. Black dots indicate the wild-type nucleotide in the *td* DNA spacer at each position. (C) Two-plasmid genetic selection system used to assay MegaTev activity on different DNA spacer substrates in *E. coli*. (D) Barplot of two-plasmid selection on different DNA spacer substrates. Data are at least three independent replicates with error bars representing standard deviation.

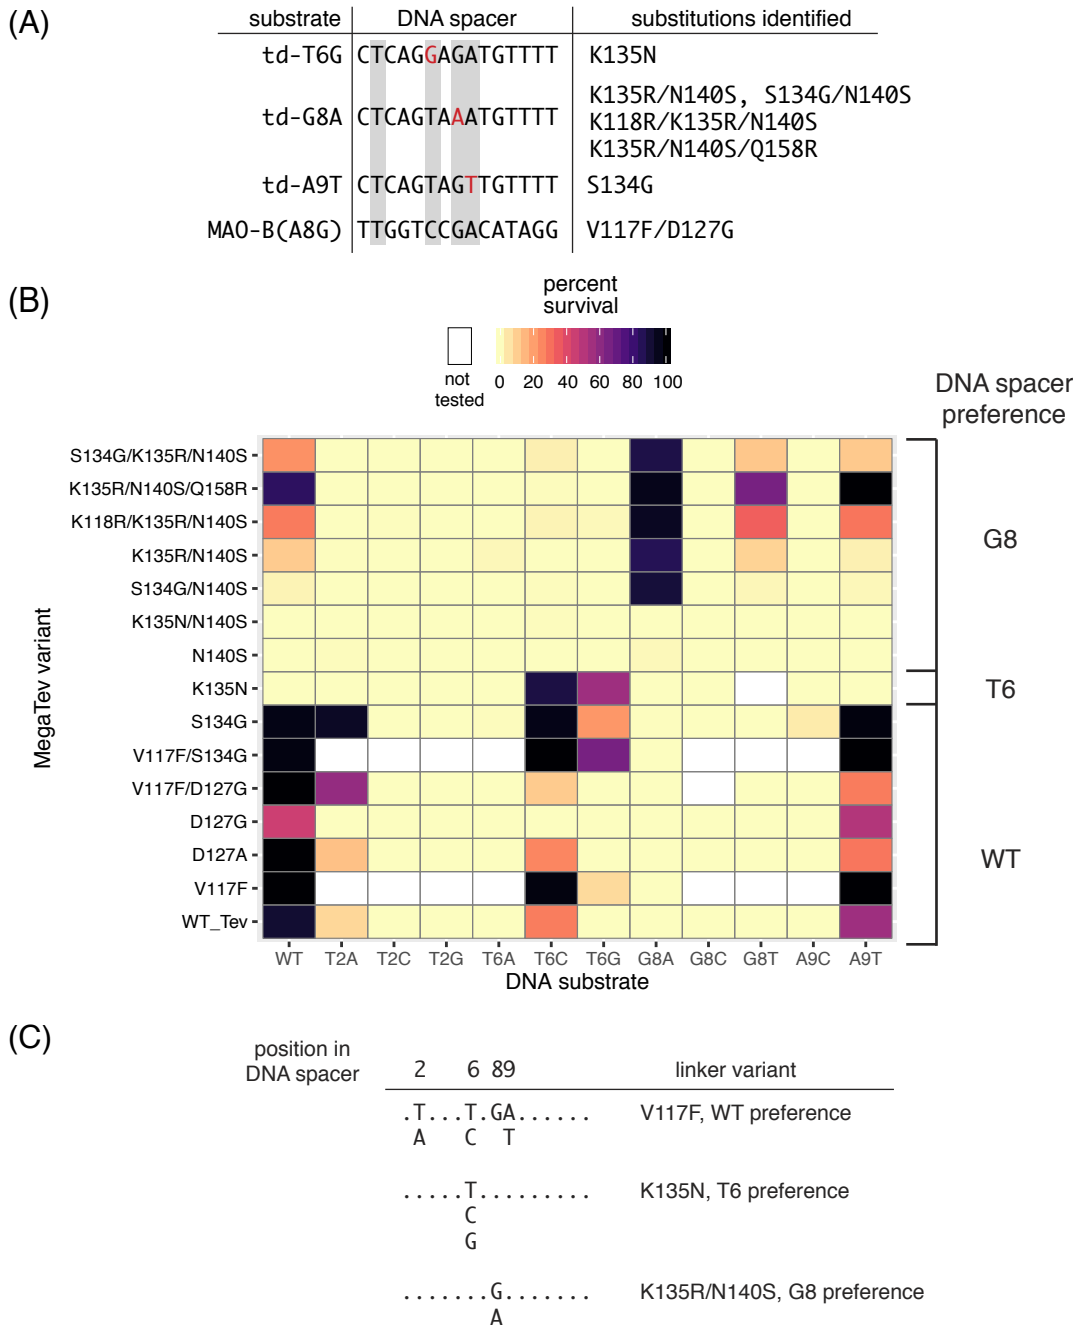

**Fig. S2.** (A) Summary of directed evolution experiments to isolate I-TevI linker variants in the MegaTev backbone. For the three *td* substrates, nucleotide substitutions relative to the wild-type sequence are in red type font. Positions 2, 6, 8, and 9 of the DNA spacer that are important for I-TevI activity are highlighted by grey rectangles. (B) De-convolution of identified amino acid substitutions on MegaTev survival against singly substituted DNA spacer substrates in the bacterial two-plasmid survival assay. Mean values from three independent biological replicates are reported in the heat map, with white boxes representing linker variant-substrate combinations that were not tested. (C) Summary of I-TevI linker variant nucleotide preferences in the DNA spacer.

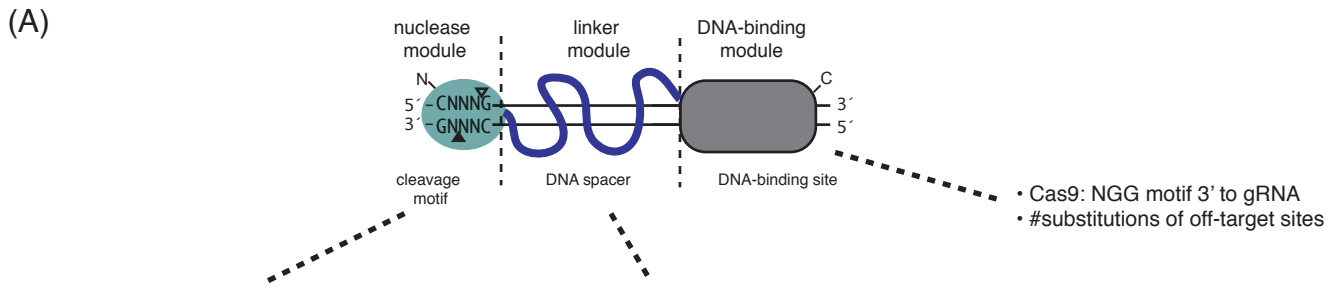

- presence or absence
- activity of nuclease module on CNNNG sequence

- DNA spacer length 15-18 bps
- fit of DNA spacer sequence to linker variant preferences

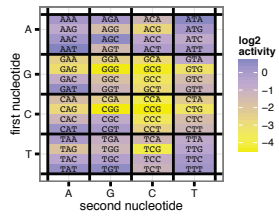

| DNA spacer | 2                          | 6 | 89 | linker variant             |
|------------|----------------------------|---|----|----------------------------|
|            | . T . . . T . GA . . . . . |   |    | V117F, WT preference       |
|            | A C T                      |   |    |                            |
|            | . . . . . T . . . . .      |   |    | K135N, T6 preference       |
|            | C                          |   |    |                            |
|            | G                          |   |    |                            |
|            | . . . . . G . . . . .      |   |    | K135R/N140S, G8 preference |
|            | A                          |   |    |                            |

(B)

| gene | rawscore | pos  | strand | spacer_len | cnng  | cnng_activity | spacer             | crispr               | PAM | z-score |
|------|----------|------|--------|------------|-------|---------------|--------------------|----------------------|-----|---------|
| TSC1 | 3.91     | 3179 | R      | 17         | CTGTG | 1.29          | CTAGGCTGAGTAGTTGG  | GACCACGCCCTGCCACAGGC | TGG | 2.6     |
| TSC1 | 3.76     | 7467 | R      | 17         | CATAG | 1.39          | CTATTCTGTGTGCAGC   | ATAAGGGCTGGTGGACAT   | CGG | 2.5     |
| TSC1 | 3.54     | 3179 | R      | 18         | CTGTG | 1.29          | CTAGGCTGAGTAGTTGGG | ACCACGCCCTGCCACAGGC  | GGG | 2.4     |
| TSC1 | 3.3      | 5074 | F      | 18         | CTGTG | 1.29          | GTCTGGTGTCCAGCTGA  | GGCAGGGGGATTGGTAGGA  | AGG | 2.3     |
| TSC1 | 3.21     | 19   | F      | 15         | CAACG | 1             | CTCAGTAGATGTTTT    | GGCGGCCCTGTAGGCTGGA  | GGG | 2.2     |
| TSC1 | 3.14     | 3805 | F      | 17         | CAAAG | 0.96          | CTTTCTGTTTCCAGGG   | TCTGAGTCAAGTTCATGTG  | TGG | 2.2     |
| TSC1 | 2.8      | 6733 | R      | 17         | CTTTG | 1.04          | GTGTGTGAGGCCAAGC   | TTGTCCAGGGAGGAGTGA   | AGG | 2.0     |
| TSC1 | 2.76     | 2145 | F      | 17         | CAGAG | 0.96          | GAAGATGGTGTGCCCTC  | TACCTCCCAATGGAAGTGC  | TGG | 2.0     |
| TSC1 | 2.49     | 6804 | F      | 17         | CTGCG | 0.76          | GAATCTTCTACTAAGC   | TTGAAGAGTGGAGAGCCGAG | AGG | 1.9     |
| TSC1 | 2.33     | 3866 | F      | 14         | CTTTG | 1.04          | GACAGCTGACTGAA     | TGCAAGACGGTTTTGGATC  | TGG | 1.8     |
| TSC1 | 2.21     | 19   | F      | 14         | CAACG | 1             | CTCAGTAGATGTTT     | TGGCGGCCCTGTAGGCTGG  | AGG | 1.8     |
| TSC1 | 2.18     | 4907 | F      | 17         | CAGAG | 0.96          | CAGTCTAAACAGAGTCC  | GGGAGAATGCTGGCAAAGGC | TGG | 1.8     |
|      |          |      |        |            | .     |               |                    |                      |     |         |
|      |          |      |        |            | .     |               |                    |                      |     |         |
|      |          |      |        |            | .     |               |                    |                      |     |         |
|      |          |      |        |            | .     |               |                    |                      |     |         |

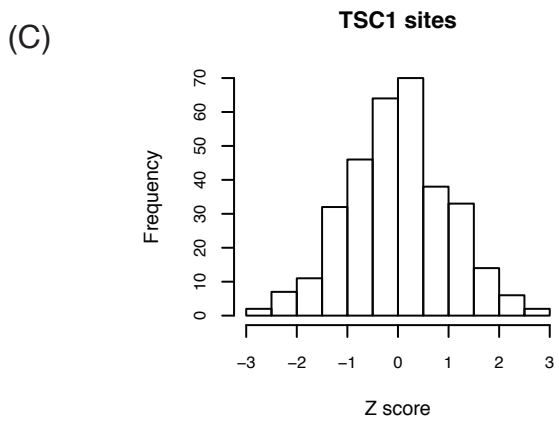

**Fig. S3.** Overview of TevCas9 binding model. (A) Schematic of TevCas9, with the individual components of the binding model highlighted for each domain. The heatmap of relative cleavage CNNNG activity is derived from supplemental reference 4. (B) Example of TevCas9 site predictions in the human TSC1 coding region ranked by Z-score. (C) Histogram of predicted sites binned according to the Z-score for the TSC1 gene.

(A)

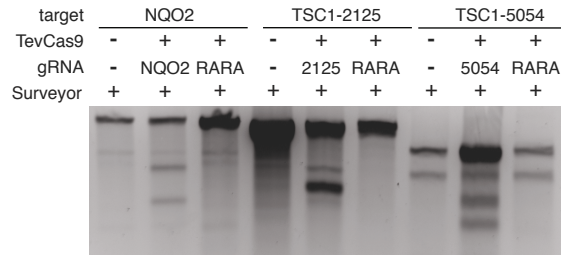

(B)

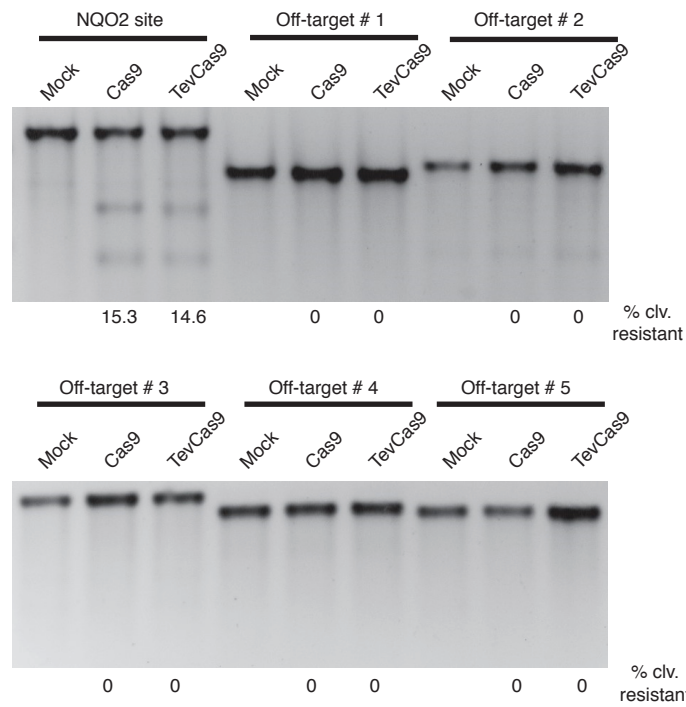

(C)

| Site           | 25bp upstream sequence     | gRNA sequence           | Score | Mismatches (MMs) | CNNNG Motif |
|----------------|----------------------------|-------------------------|-------|------------------|-------------|
| NQO2           | tctttcaacggatccttgaagaatg  | TGGCTGTAGATGAACTGAGCAGG | —     | No MMs           | Yes         |
| Off-target # 1 | gtttggaagcacctcagcaggaca   | GGCTGTAGAGGAACTGAGGTGG  | 0.9   | 3MMs [1:11:20]   | No          |
| Off-target # 2 | tcatctacgtgcatccttgaagaac  | TGGGTGTGGTGAAGTGAAGCAGG | 2.3   | 3MMs [4:8:10]    | No          |
| Off-target # 3 | ctggacgagggtggcgggccttgggg | AGGCGGTGGATGAACTGAACAG  | 0.5   | 4MMs [1:5:8:19]  | Yes         |
| Off-target # 4 | acaggttcattctcgtctctgctgct | TGGCTAAAGATGAACTGACCTGG | 0.4   | 3MMs [6:7:19]    | No          |
| Off-target # 5 | cgggatctggggttcaccatcccc   | TGGCTTTCAGGAACTGAGCTGG  | 0.3   | 4MMs [6:8:9:11]  | Yes         |

**Fig. S4.** (A) I-TevI nuclease and linker domains do not affect gRNA-mediated targeting. Show is a representative gel of T7E1 mismatch cleavage assays on the indicated target sites from HEK 293 cells transfected with different gRNAs. (B) Gel images of T7E1 mismatch cleavage assays on off-target sites predicted for the NQO2.54 gRNA. (C) Off-target predictions for the NQO2.54 gRNA from the CRISPR Design website (<http://crispr.mit.edu/>).

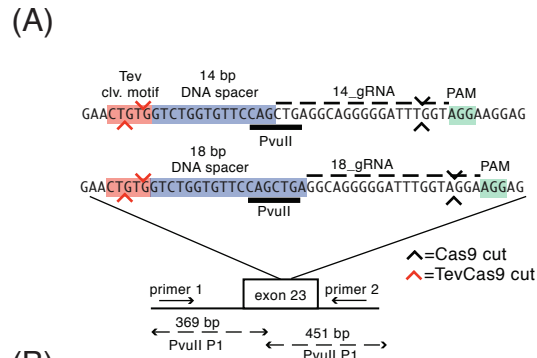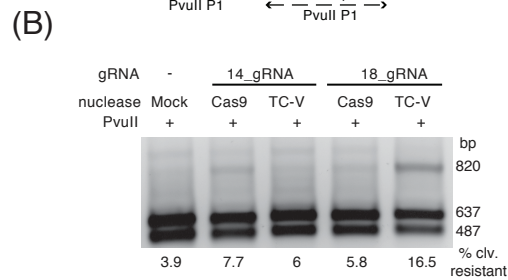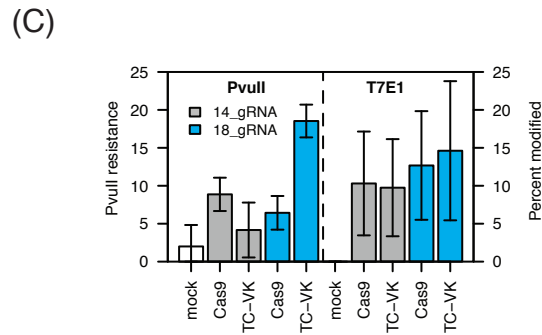

**Fig. S5.** TevCas9 activity at the TSC1.5054 site. (A) Schematic of the two TevCas9 target sites at nucleotide 5054 of the TSC1 gene that differ in the position of the PAM and the length of the DNA spacer (14\_gRNA and 18\_gRNA). (E) Representative agarose gel of PvuII cleavage assays. Sizes of the substrate (820 bp) and two PvuII cleavage resistant products (369 bp and 451 bp) are indicated. (C) Activity of TevCas9 or Cas9 programmed with the 14\_gRNA and 18\_gRNA at the TSC1-5054 site, measured by PvuII cleavage resistance (left) or T7E1 mismatch cleavage assay (right). Data are represented as barplots of mean values from three independent transfections with error bars indicating standard deviation.

(A)

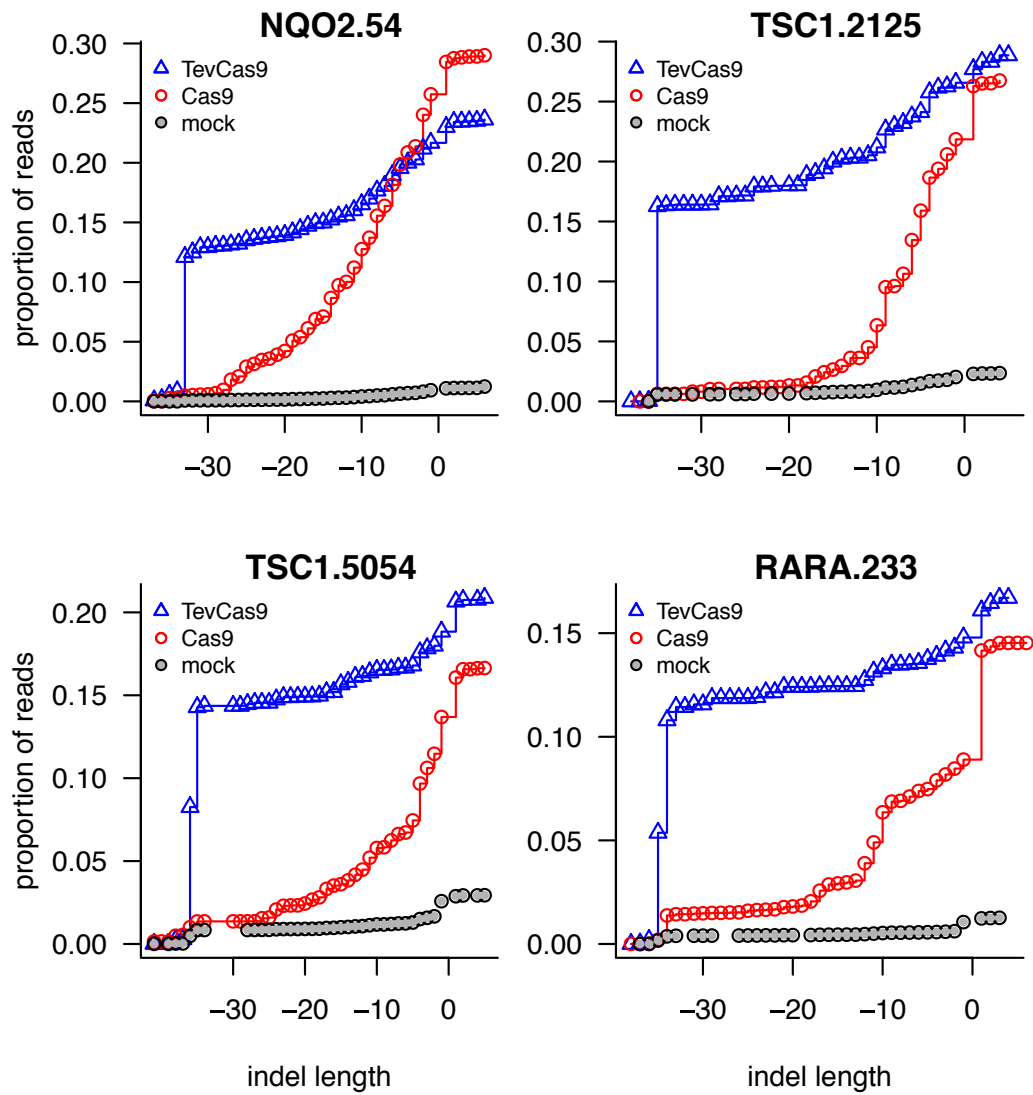

(B)

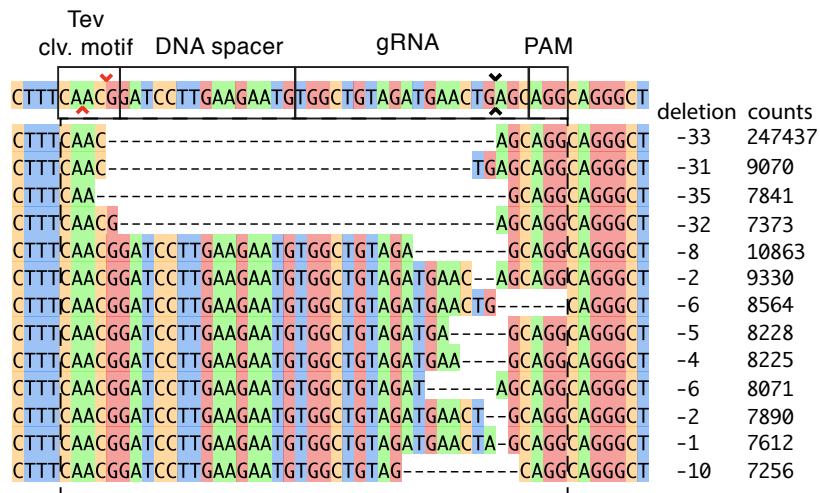

**Fig. S6.** (A) Cumulative proportion of Illumina reads of indicated length for TevCas9 and Cas9 at the indicated target sites in HEK 293. (B) Examples of deletion products at the NQO2.54 target site from Illumina read data. The dashed rectangle indicates the TevCas9 target site.

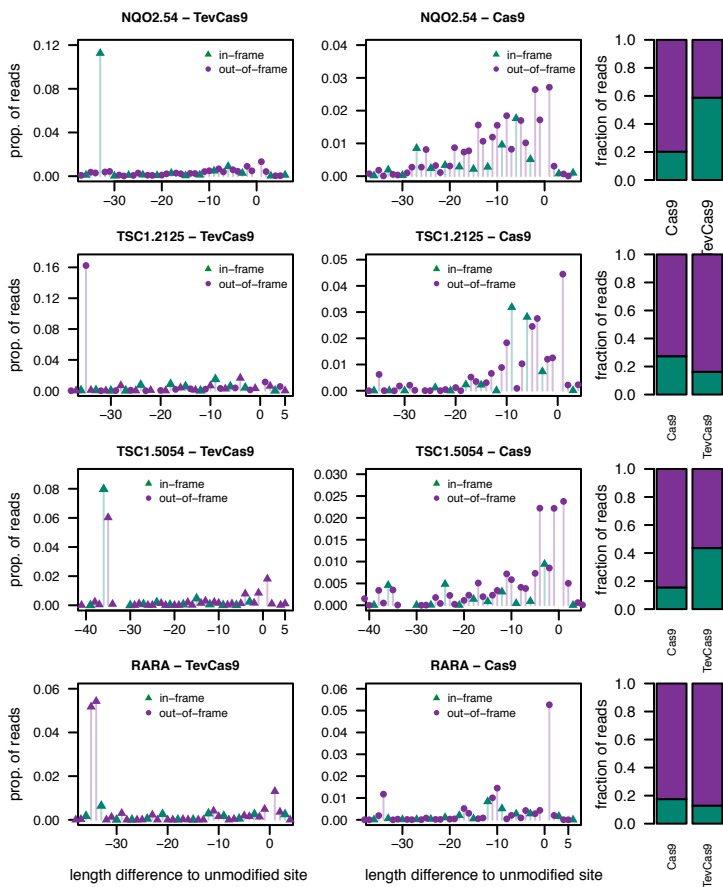

**Fig. S7.** Proportion of TevCas9 and Cas9 reads that are in-frame or out-of-frame with the surrounding exonic sequences for the indicated gene and target site



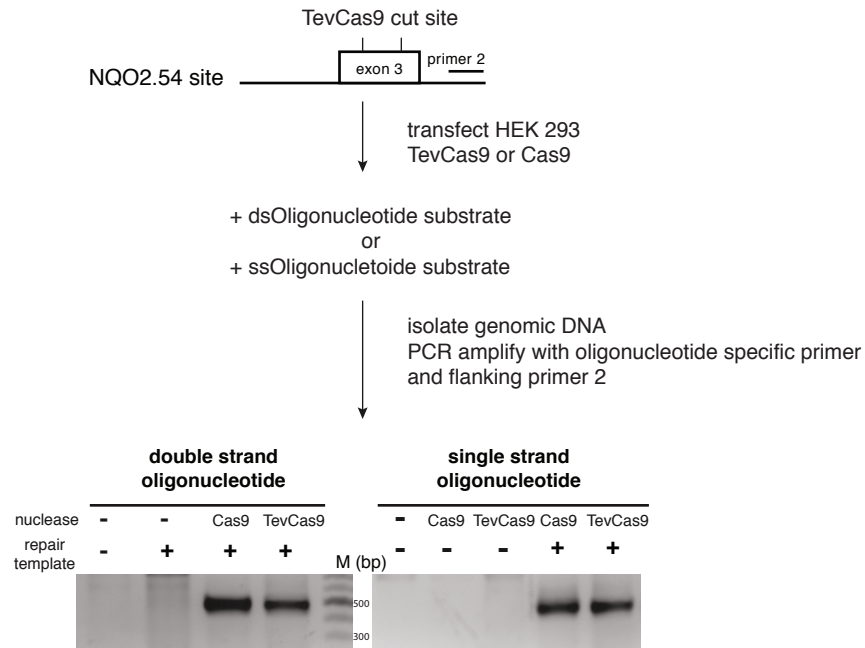

**Fig. S8.** TevCas9 can promote homology-directed repair with a single-stranded oligonucleotide or insertion of double-stranded oligonucleotide at the NQO2.54 site. Shown is a schematic of the experimental workflow, and agarose gel of PCR reactions to detect integration in HEK 293 cells.

**Table S1.** Strains used in this study.

| Strains                         | Description                                                                                                                                                                                                                                                                                                  | Source             |
|---------------------------------|--------------------------------------------------------------------------------------------------------------------------------------------------------------------------------------------------------------------------------------------------------------------------------------------------------------|--------------------|
| DH5 $\alpha$                    | F <sup>-</sup> , $\phi$ 80 <i>dlacZ</i> $\Delta$ M15, $\Delta$ ( <i>lacZYA-argF</i> )U169, <i>deoR</i> , <i>recA1</i> , <i>endA1</i> , <i>hsdR17</i> ( <i>rk</i> <sup>-</sup> , <i>mk</i> <sup>+</sup> ), <i>phoA</i> , <i>supE44</i> , $\lambda$ <sup>-</sup> , <i>thi-1</i> , <i>gyrA96</i> , <i>relA1</i> | Invitrogen         |
| ER2566                          | F- $\lambda$ - <i>fhuA2</i> [lon] <i>ompT lacZ::T7 gene 1 gal sulA11</i> $\Delta$ ( <i>mcrC-mrr</i> )114::IS10 R( <i>mcr-73::miniTn10-TetS</i> )2 R( <i>zgb-210::Tn10</i> )( <i>TetS</i> ) <i>endA1</i> [dcm]                                                                                                | N.E.B.             |
| BW25141<br>( $\lambda$ DE3)     | F <sup>-</sup> <i>lacI</i> <sup>f</sup> <i>rrnB</i> <sub>T14</sub> <i>DlacZ</i> <sub>WJ16</sub> <i>DphoBR580 hsdR514 DaraBAD</i> <sub>AH33</sub> <i>DrhaBAD</i> <sub>LD78</sub> <i>galU95 endA</i> <sub>BT333</sub> <i>uidA</i> ( <i>DMLul</i> ):: <i>pir+</i> <i>recA1</i> , $\lambda$ DE3 lysogen          |                    |
| <i>S.cerevisiae</i> -<br>YPH499 | MAT $\alpha$ <i>ura3-52 lys2-801_amber ade2-101_ochre trp1-<math>\Delta</math>63 his3-<math>\Delta</math>200 leu2-<math>\Delta</math>1</i>                                                                                                                                                                   | Dr. Adam Bogdanove |
| <i>S.cerevisiae</i> -<br>YPH500 | MAT $\alpha$ <i>ura3-52 lys2-801_amber ade2-101_ochre trp1-<math>\Delta</math>63 his3-<math>\Delta</math>200 leu2-<math>\Delta</math>1</i>                                                                                                                                                                   | Dr. Adam Bogdanove |
| HEK 293                         | Human Embryonic kidney 293 cells                                                                                                                                                                                                                                                                             | Dr. Schild-Poulter |

**Table S2:** Oligonucleotides used in this study

| Name    | Sequence (5'-3')                                                         | Notes                                                                    |
|---------|--------------------------------------------------------------------------|--------------------------------------------------------------------------|
| DE-1180 | CGCATGCGGCGCNNCAAAGGTTA<br>AATATGTGGACNNNNNNNNNNNN<br>NNCGTTGGCCGAATTCCG | Bottom strand for MegaTev TO15 N15 randomized spacer target site         |
| DE-1181 | CGGAATTCGGCCAAC                                                          | Forward primer to make DE1180 double-stranded DNA for cloning            |
| DE-1064 | CTAGACAACGCTCAGTAGATGTTTT<br>GGTCCACATATTTAACCTTTTGCATG                  | Top strand oligonucleotide for TevOnu TO15 (15-bp spacer) target site    |
| DE-1065 | CAAAGGTTAAATATGTGGACCAA<br>ACATCTACTGAGCGTTGT                            | Bottom strand oligonucleotide for TevOnu TO15 (15-bp spacer) target site |
| DE-1412 | CTAGACAACGCTCAGTACATGTTTT<br>GGTCCACATATTTAACCTTTTGCATG                  | Top strand oligonucleotide for TevOnu TO15 G8C target site               |
| DE-1413 | CAAAGGTTAAATATGTGGACCAA<br>ACATGACTGAGCGTTGT                             | Bottom strand oligonucleotide for TevOnu TO15 G8C target site            |
| DE-1414 | CTAGACAACGCTCAGTAAATGTTTT<br>GGTCCACATATTTAACCTTTTGCATG                  | Top strand oligonucleotide for TevOnu TO15 G8A target site               |
| DE-1415 | CAAAGGTTAAATATGTGGACCAA<br>ACATTACTGAGCGTTGT                             | Bottom strand oligonucleotide for TevOnu TO15 G8A target site            |
| DE-1416 | CTAGACAACGCTCAGTATATGTTTT<br>GTCCACATATTTAACCTTTTGCATG                   | Top strand oligonucleotide for TevOnu TO15 G8T target site               |
| DE-1417 | CAAAGGTTAAATATGTGGACCAA<br>ACATAACTGAGCGTTGT                             | Bottom strand oligonucleotide for TevOnu TO15 G8T target site            |
| DE-1418 | CTAGACAACGCTCAGTAGTTGTTTT<br>GGTCCACATATTTAACCTTTTGCATG                  | Top strand oligonucleotide for TevOnu TO15 A9T target site               |

|         |                                                                          |                                                                                                                              |
|---------|--------------------------------------------------------------------------|------------------------------------------------------------------------------------------------------------------------------|
| DE-1419 | CAAAGGTTAAATATGTGGACCAA<br>ACA <b>A</b> CTACTGAGCGTTGT                   | Bottom strand oligonucleotide for<br>TevOnu TO15 A9T target site                                                             |
| DE-1420 | CTAGACAACGCTCAGTAG <b>G</b> TGTTTT<br>GGTCCACATATTTAACCTTTTGCATG         | Top strand oligonucleotide for TevOnu<br>TO15 A9G target site                                                                |
| DE-1421 | CAAAGGTTAAATATGTGGACCAA<br>ACA <b>C</b> CTACTGAGCGTTGT                   | Bottom strand oligonucleotide for<br>TevOnu TO15 A9G target site                                                             |
| DE-1422 | CTAGACAACGCTCAGTAG <b>C</b> TGTTTT<br>GGTCCACATATTTAACCTTTTGCATG         | Top strand oligonucleotide for TevOnu<br>TO15 A9C target site                                                                |
| DE-1423 | CAAAGGTTAAATATGTGGACCAA<br>ACA <b>G</b> CTACTGAGCGTTGT                   | Bottom strand oligonucleotide for<br>TevOnu TO15 A9C target site                                                             |
| DE-1209 | CTAGACAACGC <b>C</b> CAGTAGA <b>CATAGG</b><br>GGTCCACATATTTAACCTTTTGCATG | Top strand oligonucleotide for TevOnu<br>TO15 T2C (includes 10-15 bp spacer<br>swapped for MAO-B sequence) target<br>site    |
| DE-1210 | CAAAGGTTAAATATGTGGACC <b>CCT</b><br><b>ATG</b> TCTACTG <b>G</b> GCGTTGT  | Bottom strand oligonucleotide for<br>TevOnu TO15 T2C (includes 10-15 bp<br>spacer swapped for MAO-B sequence)<br>target site |
| DE-1497 | CTAGACAACGC <b>G</b> CAGTAGATGTTTT<br>GGTCCACATATTTAACCTTTTGCATG         | Top strand oligonucleotide for TevOnu<br>TO15 T2G target site                                                                |
| DE-1498 | CAAAGGTTAAATATGTGGACCAA<br>ACATCTACTG <b>C</b> GCGTTGT                   | Bottom strand oligonucleotide for<br>TevOnu TO15 T2G target site                                                             |
| DE-1499 | CTAGACAACGC <b>A</b> CAGTAGATGTTTT<br>GGTCCACATATTTAACCTTTTGCATG         | Top strand oligonucleotide for TevOnu<br>TO15 T2A target site                                                                |
| DE-1500 | CAAAGGTTAAATATGTGGACCAA<br>ACATCTACTG <b>T</b> GCGTTGT                   | Bottom strand oligonucleotide for<br>TevOnu TO15 T2A target site                                                             |
| DE-1501 | CTAGACAACG <b>A</b> TCAGTAGATGTTTT<br>GGTCCACATATTTAACCTTTTGCATG         | Top strand oligonucleotide for TevOnu<br>TO15 C1A target site                                                                |
| DE-1502 | CAAAGGTTAAATATGTGGACCAA<br>ACATCTACTG <b>A</b> TCGTTGT                   | Bottom strand oligonucleotide for<br>TevOnu TO15 C1A target site                                                             |
| DE-1503 | CTAGACAACG <b>G</b> TCAGTAGATGTTTT<br>GGTCCACATATTTAACCTTTTGCATG         | Top strand oligonucleotide for TevOnu<br>TO15 C1G target site                                                                |
| DE-1504 | CAAAGGTTAAATATGTGGACCAA<br>ACATCTACTG <b>A</b> CGTTGT                    | Bottom strand oligonucleotide for<br>TevOnu TO15 C1G target site                                                             |
| DE-1505 | CTAGACAACG <b>T</b> TCAGTAGATGTTTT<br>GGTCCACATATTTAACCTTTTGCATG         | Top strand oligonucleotide for TevOnu<br>TO15 C1T target site                                                                |
| DE-1506 | CAAAGGTTAAATATGTGGACCAA<br>ACATCTACTG <b>A</b> CGTTGT                    | Bottom strand oligonucleotide for<br>TevOnu TO15 C1T target site                                                             |
| DE-1958 | CTAGACAACGCTCAG <b>C</b> AGATGTTTT<br>GGTCCACATATTTAACCTTTTGCATG         | Top strand oligonucleotide for TevOnu<br>TO15 T6C target site                                                                |
| DE-1959 | CAAAGGTTAAATATGTGGACCAA<br>ACATCT <b>G</b> CTGAGCGTTGT                   | Bottom strand oligonucleotide for<br>TevOnu TO15 T6C target site                                                             |
| DE-1960 | CTAGACAACGCTCAG <b>G</b> AGATGTTTT<br>GGTCCACATATTTAACCTTTTGCATG         | Top strand oligonucleotide for TevOnu<br>TO15 T6G target site                                                                |
| DE-1961 | CAAAGGTTAAATATGTGGACCAA<br>ACATCT <b>C</b> CTGAGCGTTGT                   | Bottom strand oligonucleotide for<br>TevOnu TO15 T6G target site                                                             |
| DE-1962 | CTAGACAACGCTCAG <b>A</b> AGATGTTTT<br>GGTCCACATATTTAACCTTTTGCATG         | Top strand oligonucleotide for TevOnu<br>TO15 T6A target site                                                                |
| DE-1963 | CAAAGGTTAAATATGTGGACCAA<br>ACATCT <b>T</b> CTGAGCGTTGT                   | Bottom strand oligonucleotide for<br>TevOnu TO15 T6A target site                                                             |

|         |                                                                     |                                                                         |
|---------|---------------------------------------------------------------------|-------------------------------------------------------------------------|
| DE-2142 | CTAGA <b>CAGAGGTGGGCAATGGCGT</b><br>GGGTCCACATATTTAACCTTTTGCAT<br>G | Top strand oligonucleotide for TevOnu TO15-PKD1 2386 target site        |
| DE-2143 | CAAAAGGTAAATATGTGGACCCAC<br>GCCATTGCCACCTCTGT                       | Bottom strand oligonucleotide for TevOnu TO15-PKD1 2386 target site     |
| DE-2144 | CTAGA <b>CTTTGGAAGGTAATTACAGT</b><br>GGTCCACATATTTAACCTTTTGCATG     | Top strand oligonucleotide for TevOnu TO15-HPRT 5740 target site        |
| DE-2145 | CAAAAAGGTAAATATGTGGACCAC<br>TGTAATTACCTTCCAAAGT                     | Bottom strand oligonucleotide for TevOnu TO15- HPRT 5740 target site    |
| DE-2146 | CTAGA <b>CTGTGCTCAGGTGATCCTCC</b><br>GGTCCACATATTTAACCTTTTGCATG     | Top strand oligonucleotide for TevOnu TO15-Ku70 14915 target site       |
| DE-2147 | CAAAAGGTAAATATGTGGACCGGA<br>GGATCACCTGAGCACAGT                      | Bottom strand oligonucleotide for TevOnu TO15- Ku70 14915 target site   |
| DE-2148 | CTAGA <b>CTAAGGTGGTCCTTCCCAGA</b><br>GGTCCACATATTTAACCTTTTGCATG     | Top strand oligonucleotide for TevOnu TO15- XPC 1277 target site        |
| DE-2149 | CAAAAGGTAAATATGTGGACCTCT<br>GGGAAGGACCACCTTAGT                      | Bottom strand oligonucleotide for TevOnu TO15-XPC 1277 target site      |
| DE-2206 | CTAGA <b>CATTGCTGTGCTTTGGGGAT</b><br>GGTCCACATATTTAACCTTTTGCATG     | Top strand oligonucleotide for TevOnu TO15-VEGFA 2522 target site       |
| DE-2207 | CAAAAGGTAAATATGTGGACCCTT<br>GCAATAATTCTGCAATGT                      | Bottom strand oligonucleotide for TevOnu TO15-VEGFA 2522 target site    |
| DE-2208 | CTAGA <b>CAGAGGAAGATGGTGTGCC</b><br>CGGTCCACATATTTAACCTTTTGCAT<br>G | Top strand oligonucleotide for TevOnu TO15-TSC1-2125 target site        |
| DE-2209 | CAAAAGGTAAATATGTGGACCGGG<br>CACACCATCTTCCTCTGT                      | Bottom strand oligonucleotide for TevOnu TO15-TSC1-2125 target site     |
| DE-2210 | CTAGA <b>CTGTGGTCTGGTGTTCAGC</b><br>GGTCCACATATTTAACCTTTTGCATG      | Top strand oligonucleotide for TevOnu TO15-TSC1-5054 target site        |
| DE-2211 | CAAAAGGTAAATATGTGGACCGCT<br>GGAACACCAGACCACAGT                      | Bottom strand oligonucleotide for TevOnu TO15-TSC1-5054 target site     |
| DE-2212 | CTAGA <b>CTGTGCAGCATGGAATTCCT</b><br>GGTCCACATATTTAACCTTTTGCATG     | Top strand oligonucleotide for TevOnu TO15-TSC1-6374 target site        |
| DE-2213 | CAAAAGGTAAATATGTGGACCAGG<br>AATTCCATGCTGCACAGT                      | Bottom strand oligonucleotide for TevOnu TO15-TSC1-6374 target site     |
| DE-2216 | CTAGA <b>CATTGCAGAATTATTGCAAG</b><br>GGTCCACATATTTAACCTTTTGCATG     | Top strand oligonucleotide for TevOnu TO15-APC 1440 target site         |
| DE-2217 | CAAAAGGTAAATATGTGGACCCTT<br>GCAATAATTCTGCAATGT                      | Bottom strand oligonucleotide for TevOnu TO15-APC 1440 site             |
| DE-2218 | CTAGA <b>CATTGGTACCTGGTACTGAT</b><br>GGTCCACATATTTAACCTTTTGCATG     | Top strand oligonucleotide for TevOnu TO15-BRAC1-2541 target site       |
| DE-2219 | CAAAAGGTAAATATGTGGACCATC<br>AGTACCAGGTACCAATGT                      | Bottom strand oligonucleotide for TevOnu TO15-BRAC1-2541 target site    |
| DE-2220 | CTAGA <b>CAGAGGCGAATTTATTATCA</b><br>GGTCCACATATTTAACCTTTTGCATG     | Top strand oligonucleotide for TevOnu TO15-BRAC1-3999 target site       |
| DE-2221 | CAAAAGGTAAATATGTGGACCTGA<br>TAATAAATTCGCCTCTGT                      | Bottom strand oligonucleotide for TevOnu TO15-BRAC1-3999 target site    |
| DE-2645 | CACCGTGGCTGTAGATGAACTGAGC                                           | Top strand oligonucleotide for Cas9 human NQO2 gRNA with BbsI overhangs |

|                |                           |                                                                                   |
|----------------|---------------------------|-----------------------------------------------------------------------------------|
| <b>DE-2646</b> | AAACGCTCAGTTCATCTACAGCCAC | Bottom strand oligonucleotide for Cas9 human NQO2 gRNA with BbsI overhangs        |
| <b>DE-2701</b> | CACCGTTAGCATCTTGGGGAACATG | Top strand oligonucleotide for Cas9 human RARA gRNA with BbsI overhangs           |
| <b>DE-2702</b> | AAACCATGTTCCCCAAGATGCTAAC | Bottom strand oligonucleotide for Cas9 human RARA gRNA with BbsI overhangs        |
| <b>DE-2703</b> | CACCGTACCTCCCCAATGGAAGTGC | Top strand oligonucleotide for Cas9 human TSC1-1 gRNA with BbsI overhangs         |
| <b>DE-2704</b> | AAACGCACTTCCATTGGGGAGGTAC | Bottom strand oligonucleotide for Cas9 human TSC1-1 gRNA with BbsI overhangs      |
| <b>DE-2705</b> | CACCGCTGAGGCAGGGGGATTTGGT | Top strand oligonucleotide for Cas9 human TSC1-2 14bp gRNA with BbsI overhangs    |
| <b>DE-2706</b> | AAACACCAAATCCCCCTGCCTCAGC | Bottom strand oligonucleotide for Cas9 human TSC1-2 14bp gRNA with BbsI overhangs |
| <b>DE-2707</b> | CACCGGGCAGGGGGATTTGGTAGGA | Top strand oligonucleotide for Cas9 human TSC1-2 gRNA 18bp with BbsI overhangs    |
| <b>DE-2708</b> | AAACTCCTACCAAATCCCCCTGCC  | Bottom strand oligonucleotide for Cas9 human TSC1-2 18bp gRNA with BbsI overhangs |
| <b>DE-2510</b> | GTTCAAACACACATGCTCTGC     | Forward primer for 1 <sup>st</sup> round amplification of NQO2 54 site human site |
| <b>DE-2511</b> | GCACTCCTGATGCTTCCTGTGGG   | Reverse primer for 1 <sup>st</sup> round amplification of NQO2 54 site human site |
| <b>DE-2512</b> | CAATCATCACAGGGTCCTGAGGC   | Forward primer for 2 <sup>nd</sup> round amplification of NQO2 54 site human site |
| <b>DE-2513</b> | GGAACCCCAGAAAATTGAGAAGC   | Reverse primer for 2 <sup>nd</sup> round amplification of NQO2 54 human site      |
| <b>DE-2359</b> | TGAGAGCCGTTTTCAACCCT      | Forward primer for 1 <sup>st</sup> round amplification of TSC1 2125 human site    |
| <b>DE-2360</b> | CCAGCCTTCTCTGTTTCAGCA     | Reverse primer for 1 <sup>st</sup> round amplification of TSC1 2125 human site    |
| <b>DE-2361</b> | GGGATGTCAGGCCATCTGAA      | Forward primer for 2 <sup>nd</sup> round amplification of TSC1 2125 human site    |
| <b>DE-2362</b> | GGTGAATACCGACTGCCAT       | Reverse primer for 2 <sup>nd</sup> round amplification of TSC1 2125 human site    |
| <b>DE-2779</b> | ACGTCCATGGAGCTTCTAGC      | Forward primer for 1 <sup>st</sup> round amplification of TSC1 5054 human site    |
| <b>DE2780</b>  | CCCGAGAAGCACTTGAGCAT      | Reverse primer for 1 <sup>st</sup> round amplification of TSC1 5054 human site    |
| <b>DE2713</b>  | TTCAGTACCAACTGCCAGCC      | Forward primer for 2 <sup>nd</sup> round amplification of TSC1 5054 human site    |
| <b>DE-2714</b> | ACCCTTCTGTCTACTGGCCT      | Reverse primer for 2 <sup>nd</sup> round amplification of TSC1 5054 human site    |
| <b>DE-2777</b> | ACGTCCATGGAGCTTCTAGC      | Forward primer for 1 <sup>st</sup> round amplification of RARA 233 human site     |

|                |                                                                      |                                                                                   |
|----------------|----------------------------------------------------------------------|-----------------------------------------------------------------------------------|
| <b>DE-2778</b> | CCCGAGAAGCACTTGAGCAT                                                 | Reverse primer for 1 <sup>st</sup> round amplification of RARA 233 human site     |
| <b>DE-2711</b> | TTCAGTACCAACTGCCAGCC                                                 | Forward primer for 2 <sup>nd</sup> round amplification of RARA 233 human site     |
| <b>DE-2712</b> | ACCCTTCTGTCTACTGGCCT                                                 | Reverse primer for 2 <sup>nd</sup> round amplification of RARA 233 human site     |
| <b>DE-2783</b> | TTCTCTCCCACAGCTGTCCA                                                 | Forward primer for 1 <sup>st</sup> round amplification of NQ02 54 site human site |
| <b>DE-2784</b> | CACTAGGTGCAGACTCAGGC                                                 | Reverse primer for 1 <sup>st</sup> round amplification of NQ02 54 site human site |
| <b>DE-2719</b> | CAAGGCCCTCTCTCTTTTCG                                                 | Forward primer for 2 <sup>nd</sup> round amplification of NQ02 54 site human site |
| <b>DE-2720</b> | ATGGGTAGAAGCAGATGCCG                                                 | Reverse primer for 2 <sup>nd</sup> round amplification of NQ02 54 human site      |
| <b>DE-2721</b> | CCACTGCCAGATTTCTCCCC                                                 | Forward primer for 1 <sup>st</sup> round amplification of NQ02 54 site human site |
| <b>DE-2722</b> | GGGCATTCATTTGTCTGCACTT                                               | Reverse primer for 1 <sup>st</sup> round amplification of NQ02 54 site human site |
| <b>DE-2723</b> | TCCTGCCAGGGAGTGATACA                                                 | Forward primer for 1 <sup>st</sup> round amplification of NQ02 54 site human site |
| <b>DE-2724</b> | CCAGGGTCGCGAACTAATGA                                                 | Reverse primer for 1 <sup>st</sup> round amplification of NQ02 54 site human site |
| <b>DE-2785</b> | TGCAACACCCTCTTTAATACTGA                                              | Forward primer for 1 <sup>st</sup> round amplification of NQ02 54 site human site |
| <b>DE-2786</b> | AAAACGACCTCCGGTTTGTG                                                 | Reverse primer for 1 <sup>st</sup> round amplification of NQ02 54 site human site |
| <b>DE-2725</b> | AGCTGAATCCAGATGCCAGT                                                 | Forward primer for 2 <sup>nd</sup> round amplification of NQ02 54 site human site |
| <b>DE-2726</b> | GTGAAACTGGGTTTGCCCT                                                  | Reverse primer for 2 <sup>nd</sup> round amplification of NQ02 54 human site      |
| <b>DE-2727</b> | GCCCCATTTTCCTGATGGGA                                                 | Forward primer for 1 <sup>st</sup> round amplification of NQ02 54 site human site |
| <b>DE-2728</b> | ATCCAGAGTGGTTCCATGCG                                                 | Reverse primer for 1 <sup>st</sup> round amplification of NQ02 54 site human site |
| <b>DE-2787</b> | CTTGGTGCTGTTGCACTCAT                                                 | Forward primer for 1 <sup>st</sup> round amplification of NQ02 54 site human site |
| <b>DE-2788</b> | GCCGCCTACTCCTCTTTTCTT                                                | Reverse primer for 1 <sup>st</sup> round amplification of NQ02 54 site human site |
| <b>DE-2729</b> | GTGCCTCCTCAATGGTGACTION                                              | Forward primer for 2 <sup>nd</sup> round amplification of NQ02 54 site human site |
| <b>DE-2730</b> | GGTCAGGTGTGAGGGACTCT                                                 | Reverse primer for 2 <sup>nd</sup> round amplification of NQ02 54 human site      |
| <b>DE-2835</b> | ACACTCTTTCCCTACACGACGCTCT<br>TCCGATCTNNNNccaaggccTCTATGC<br>ACACCAGG | Forward primer to amplify NQ02 54 for illumina sequencing                         |
| <b>DE-2836</b> | ACACTCTTTCCCTACACGACGCTCT<br>TCCGATCTNNNNcattaaggTCTATGCA<br>CACCAGG | Forward primer to amplify NQ02 54 for illumina sequencing                         |

|                |                                                                     |                                                                |
|----------------|---------------------------------------------------------------------|----------------------------------------------------------------|
| <b>DE-2837</b> | ACACTCTTCCCTACACGACGCTCT<br>TCCGATCTNNNNataacgaaTCTATGC<br>ACACCAGG | Forward primer to amplify NQO2 54 for<br>illumina sequencing   |
| <b>DE-2843</b> | CGGTCTCGGCATTCTGCTGAACCG<br>CTCTTCCGATCTGGCTCAAGTTCA<br>TGGC        | Reverse primer to amplify NQO2 54 for<br>illumina sequencing   |
| <b>DE-2844</b> | ACACTCTTCCCTACACGACGCTCT<br>TCCGATCTNNNNagttaaccGAGTGCC<br>CCAGTCCC | Forward primer to amplify TSC1 2125 for<br>illumina sequencing |
| <b>DE-2845</b> | ACACTCTTCCCTACACGACGCTCT<br>TCCGATCTNNNNcaggcttaGAGTGCC<br>CCAGTCCC | Forward primer to amplify TSC1 2125 for<br>illumina sequencing |
| <b>DE-2846</b> | ACACTCTTCCCTACACGACGCTCT<br>TCCGATCTNNNNtggcggctGAGTGCC<br>CCAGTCCC | Forward primer to amplify TSC1 2125 for<br>illumina sequencing |
| <b>DE-2847</b> | CGGTCTCGGCATTCTGCTGAACCG<br>CTCTTCCGATCTTGCCAAAGACAGC<br>CC         | Reverse primer to amplify TSC1 2125 for<br>illumina sequencing |
| <b>DE-2848</b> | ACACTCTTCCCTACACGACGCTCT<br>TCCGATCTNNNNcttctctgTTCGTACC<br>GTGACAG | Forward primer to amplify TSC1 5054 for<br>illumina sequencing |
| <b>DE-2849</b> | ACACTCTTCCCTACACGACGCTCT<br>TCCGATCTNNNNgtactgctTTCGTACC<br>GTGACAG | Forward primer to amplify TSC1 5054 for<br>illumina sequencing |
| <b>DE-2850</b> | ACACTCTTCCCTACACGACGCTCT<br>TCCGATCTNNNNgctcattgTTCGTACC<br>GTGACAG | Forward primer to amplify TSC1 5054 for<br>illumina sequencing |
| <b>DE-2851</b> | CGGTCTCGGCATTCTGCTGAACCG<br>CTCTTCCGATCTTTGGCAGTGGCAG<br>AG         | Reverse primer to amplify TSC1 5054 for<br>illumina sequencing |
| <b>DE-2852</b> | ACACTCTTCCCTACACGACGCTCT<br>TCCGATCTNNNNgacactcgCGCTGCT<br>GGAGGCGC | Forward primer to amplify RARA 233 for<br>illumina sequencing  |
| <b>DE-2853</b> | ACACTCTTCCCTACACGACGCTCT<br>TCCGATCTNNNNatccactaCGCTGCT<br>GGAGGCGC | Forward primer to amplify RARA 233 for<br>illumina sequencing  |
| <b>DE-2854</b> | ACACTCTTCCCTACACGACGCTCT<br>TCCGATCTNNNNtatacagCGCTGCTG<br>GAGGCGC  | Forward primer to amplify RARA 233 for<br>illumina sequencing  |

**DE-2855** CGGTCTCGGCATTCTGCTGAACCG Reverse primer to amplify RARA 233 for  
 CTCTTCCGATCTGGGCCAGGTGTCG illumina sequencing  
 GG

**Table S3.** Summary of Illumina sequencing for target sites PCR amplified from HEK 293 cells.

| Target    | Experiment | Reads   | Mapped reads |
|-----------|------------|---------|--------------|
| NQO2      | mock       | 530661  | 491211       |
| NQO2      | TevCas9    | 2842357 | 2582707      |
| NQO2      | Cas9       | 2660524 | 2399872      |
| TSC1.2125 | mock       | 365918  | 337397       |
| TSC1.2125 | TevCas9    | 1956085 | 1798789      |
| TSC1.2125 | Cas9       | 1390504 | 1262671      |
| TSC1.5054 | mock       | 535409  | 481287       |
| TSC1.5054 | TevCas9    | 1667988 | 1481161      |
| TSC1.5054 | Cas9       | 1887131 | 1673952      |
| RARA      | mock       | 398412  | 360461       |
| RARA      | TevCas9    | 1207917 | 1086409      |
| RARA      | Cas9       | 1137422 | 1021858      |

## SUPPLEMENTAL REFERENCES

1. Edgell DR, Stanger MJ, & Belfort M (2003) Importance of a single base pair for discrimination between intron-containing and intronless alleles by endonuclease I-BmoI. *Current biology : CB* 13(11):973-978.
2. Kleinstiver BP, *et al.* (2012) Monomeric site-specific nucleases for genome editing. *Proceedings of the National Academy of Sciences of the United States of America* 109(21):8061-8066.
3. Fernandes AD, *et al.* (2014) Unifying the analysis of high-throughput sequencing datasets: characterizing RNA-seq, 16S rRNA gene sequencing and selective growth experiments by compositional data analysis. *Microbiome* 2:15.
4. Wolfs JA, *et al.* (2014) MegaTevs: Single chain dual nucleases for efficient gene disruptions. *Nucleic acids research* 42(13):8816-8829.
5. Hsu PD, *et al.* (2013) DNA targeting specificity of RNA-guided Cas9 nucleases. *Nature biotechnology* 31(9):827-832.
