# Supplementary material
Source: PubMed Central journal article supplement (PMC5206545)
Supplement: pnas.1616343114.sd01.pdf [file pnas.1616343114.sd01.pdf]

## Constructs used in this study

### Tev169-xOnu (MegaTev)

MKSGIYQIKNTLNNKVYVGSADFEKRWKRHFKDLEKGCHSSIKLQRSFNKHGNVFECSILEEIPYEKDLIIERENFWIKEL  
NSKINGYNIADATFGDTCSTHPLKEEIIKKRSETVKAKMLKLGPDGRKALYSKPGSKNGRWNPEHFKFCKCGVRIQTSAY  
TCSKCRNGSGSGGSAYMSRRESINPWILTFADAQGSFLLRIRNSNKR SVGYATELGFQICLHIKDKSILENIQSTWKV  
GVIANS GDNAVSLRVTRFEDLKVIIDHFEKYPLITQKLG DYMLFKQAF CVMENKEHLKINGIKELVRIKAKLNWGLTDELK  
KAFPEIISKERSLINKNIPNFKWLAGFTSGEGCFFVNLIKSN SKLGVQVQLVFSITQHIKDKNLMNSLITYLGC GYIKEKNRS  
EFSWLD FVVTKFSDINDKIIPVFQENTLIGVKLEDFEDWCKVAKLIEEKKHLTESGLDEIKKIKLNMNKGRVF

### V117F Tev169-xOnu

MKSGIYQIKNTLNNKVYVGSADFEKRWKRHFKDLEKGCHSSIKLQRSFNKHGNVFECSILEEIPYEKDLIIERENFWIKEL  
NSKINGYNIADATFGDTCSTHPLKEEIIKKRSETVKAKMLKLGPDGRKALYSKPGSKNGRWNPEHFKFCKCGVRIQTSAY  
TCSKCRNGSGSGGSAYMSRRESINPWILTFADAQGSFLLRIRNSNKR SVGYATELGFQICLHIKDKSILENIQSTWKV  
GVIANS GDNAVSLRVTRFEDLKVIIDHFEKYPLITQKLG DYMLFKQAF CVMENKEHLKINGIKELVRIKAKLNWGLTDELK  
KAFPEIISKERSLINKNIPNFKWLAGFTSGEGCFFVNLIKSN SKLGVQVQLVFSITQHIKDKNLMNSLITYLGC GYIKEKNRS  
EFSWLD FVVTKFSDINDKIIPVFQENTLIGVKLEDFEDWCKVAKLIEEKKHLTESGLDEIKKIKLNMNKGRVF

### S134G Tev169-xOnu

MKSGIYQIKNTLNNKVYVGSADFEKRWKRHFKDLEKGCHSSIKLQRSFNKHGNVFECSILEEIPYEKDLIIERENFWIKEL  
NSKINGYNIADATFGDTCSTHPLKEEIIKKRSETVKAKMLKLGPDGRKALYSGKPGSKNGRWNPEHFKFCKCGVRIQTSAY  
TCSKCRNGSGSGGSAYMSRRESINPWILTFADAQGSFLLRIRNSNKR SVGYATELGFQICLHIKDKSILENIQSTWKV  
GVIANS GDNAVSLRVTRFEDLKVIIDHFEKYPLITQKLG DYMLFKQAF CVMENKEHLKINGIKELVRIKAKLNWGLTDELK  
KAFPEIISKERSLINKNIPNFKWLAGFTSGEGCFFVNLIKSN SKLGVQVQLVFSITQHIKDKNLMNSLITYLGC GYIKEKNRS  
EFSWLD FVVTKFSDINDKIIPVFQENTLIGVKLEDFEDWCKVAKLIEEKKHLTESGLDEIKKIKLNMNKGRVF

### K135N Tev169-xOnu

MKSGIYQIKNTLNNKVYVGSADFEKRWKRHFKDLEKGCHSSIKLQRSFNKHGNVFECSILEEIPYEKDLIIERENFWIKEL  
NSKINGYNIADATFGDTCSTHPLKEEIIKKRSETVKAKMLKLGPDGRKALYSNPGSKNGRWNPEHFKFCKCGVRIQTSAY  
TCSKCRNGSGSGGSAYMSRRESINPWILTFADAQGSFLLRIRNSNKR SVGYATELGFQICLHIKDKSILENIQSTWKV  
GVIANS GDNAVSLRVTRFEDLKVIIDHFEKYPLITQKLG DYMLFKQAF CVMENKEHLKINGIKELVRIKAKLNWGLTDELK  
KAFPEIISKERSLINKNIPNFKWLAGFTSGEGCFFVNLIKSN SKLGVQVQLVFSITQHIKDKNLMNSLITYLGC GYIKEKNRS  
EFSWLD FVVTKFSDINDKIIPVFQENTLIGVKLEDFEDWCKVAKLIEEKKHLTESGLDEIKKIKLNMNKGRVF

### K135R/N140S Tev169-xOnu

MKSGIYQIKNTLNNKVYVGSADFEKRWKRHFKDLEKGCHSSIKLQRSFNKHGNVFECSILEEIPYEKDLIIERENFWIKEL  
NSKINGYNIADATFGDTCSTHPLKEEIIKKRSETVKAKMLKLGPDGRKALYSRPGSKSGRWNPEHFKFCKCGVRIQTSAYT  
CSKCRNGSGSGGSAYMSRRESINPWILTFADAQGSFLLRIRNSNKR SVGYATELGFQICLHIKDKSILENIQSTWKVG  
VIANS GDNAVSLRVTRFEDLKVIIDHFEKYPLITQKLG DYMLFKQAF CVMENKEHLKINGIKELVRIKAKLNWGLTDELK  
AFPEIISKERSLINKNIPNFKWLAGFTSGEGCFFVNLIKSN SKLGVQVQLVFSITQHIKDKNLMNSLITYLGC GYIKEKNRSE  
FSWLD FVVTKFSDINDKIIPVFQENTLIGVKLEDFEDWCKVAKLIEEKKHLTESGLDEIKKIKLNMNKGRVF

### V117F/K135N Tev169-xOnu

MKSGIYQIKNTLNNKVYVGSADFEKRWKRHFKDLEKGCHSSIKLQRSFNKHGNVFECSILEEIPYEKDLIIERENFWIKEL  
NSKINGYNIADATFGDTCSTHPLKEEIIKKRSETVKAKMLKLGPDGRKALYSNPGSKNGRWNPEHFKFCKCGVRIQTSAY  
TCSKCRNGSGSGGSAYMSRRESINPWILTFADAQGSFLLRIRNSNKR SVGYATELGFQICLHIKDKSILENIQSTWKV  
GVIANS GDNAVSLRVTRFEDLKVIIDHFEKYPLITQKLG DYMLFKQAF CVMENKEHLKINGIKELVRIKAKLNWGLTDELK

KAPPEISKERSLINKNIPNFKWLAGFTSGEGCFFVNLIKSNKLGVQVQLVFSITQHIKDKNLMNSLITYLGCGYIKEKNRS  
EFSWLDVVTKFSDINDKIIPVFQENTLIGVKLEDFEDWCKVAKLIEEKKHLTESGLDEIKKIKLNMNKGRVF

V117F/K135R/N140S Tev169-xOnu

MKSGIYQIKNTLNNKVYVGS AKDFEKRWRHFKDLEKGCHSSIKLQRSFNKHGNVFECSILEEIPYEKDLIERENFWIKEL  
NSKINGYNIADATFGDTCSTHPLKEEIIKKRSETVAKAKMLKLGPDGRKALYSRPGSKSGRWNPEHFKFCKGVRIQTSAYT  
CSKCRNGGSGGSGSAYMSRRESINPWILTFADAQGSFLLRIRNSNKR SVGYATELGFQICLHIKDKSILENIQSTWVKVG  
VIANS GDNAVSLRVTRFEDLKVIIDHFEKYPLITQKLG DYMLFKQAF CVMENKEHLKINGIKELVRIKAKLNWGLTDELKK  
AFPEISKERSLINKNIPNFKWLAGFTSGEGCFFVNLIKSNKLGVQVQLVFSITQHIKDKNLMNSLITYLGCGYIKEKNRSE  
FSWLDVVTKFSDINDKIIPVFQENTLIGVKLEDFEDWCKVAKLIEEKKHLTESGLDEIKKIKLNMNKGRVF

xTev169-Onu

MKSGIYQIKNTLNNKVYVGS AKDFEKA WKRHFKDLEKGCHSSIKLQRSFNKHGNVFECSILEEIPYEKDLIERENFWIKEL  
NSKINGYNIADATFGDTCSTHPLKEEIIKKRSETVAKAKMLKLGPDGRKALYSKPGSKNGRWNPEHFKFCKGVRIQTSAY  
TCSKCRNGGSGGSGSAYMSRRESINPWILTFADAEGSFLLRIRNSNKR SVGYATELGFQICLHIKDKSILENIQSTWVKVG  
VIANS GDNAVSLRVTRFEDLKVIIDHFEKYPLITQKLG DYMLFKQAF CVMENKEHLKINGIKELVRIKAKLNWGLTDELKK  
AFPEISKERSLINKNIPNFKWLAGFTSGEGCFFVNLIKSNKLGVQVQLVFSITQHIKDKNLMNSLITYLGCGYIKEKNRSE  
FSWLDVVTKFSDINDKIIPVFQENTLIGVKLEDFEDWCKVAKLIEEKKHLTESGLDEIKKIKLNMNKGRVF

TevCas9

MKSGIYQIKNTLNNKVYVGS RKF EKA WKRHFKDLEKGCHSSIKLQRSFNKHGNVFECSILEEIPYEKDLIERENFWIKE  
LNSKINGYNIADATFGDTCSTHPLKEEIIKKRSETVAKAKMLKLGPDGRKALYSKPGSKNGRWNPEHFKFCKGVRIQTS  
YTCSKCRNGGSGGSDKKYSIGLDIGTNSVGWAVITDEYKVP SKFKVLGNTDRHSIKKNLIGALLFDSGETAEATRLKRTA  
RRRYTRRKNRICYLQEIFSNEMAKVDDSFHRL EESFLVEEDKKHERHPIFGNIVDEVAYHEKYPTIYHLRKKLVDSTDKAD  
LRLIYLALAHMIKFRGHFLIEGDLNPDNSDVKLFIQLVQTYNQLFEENPINASGVDAKAILSARLSKSRRENLI AQLPGE  
KKNGLFGNLI ALSGLTPNFKSNFDLAEDAKLQLSKDTYDDDLDNLLAQIGDQYADLFLAAKNLSDAILSDILRVNTEITK  
APLSAMIKRYDEHHQDLTLLKALVRQQLP EKYKEIFFDQSKNGYAGYIDGGASQE EYKFIKPILEKMDGTEELLVKNR  
EDLLRKQRTFDNGSIPHQIHLGELHAILRRQEDFY PFLKDNREKIEKILTFRIPYVGLARGNSRFAWMTRKSEETIPW  
NFEVV DKGASAQSFIERMTNFDKNLPNEKVLPHSLLYEYFTVYNELTKVKYVTEGMRKPAFLSGEQKKAIVDLLFKTN  
RKVTVKQLKEDYFKKIECFDSVEISGVEDRFNASLGTYHDLKIIKDKDFLDNEENEDILEDIVLTLTFEDREMIEERLKYA  
HLFDDKVMKQLKRRRYTGWGRLSRKLINGIRDKQSGKTILDFLKSDFANRNFMQLIHDDSLTFKEDIQKAQVSGQGD  
SLHEHIANLAGSPA IKKILQTVKVVDELVKVMGRHKPENIVIAMARENQTTQKGQKNSRERMKRIE EGKELGSQILKE  
HPVENTQLQNEKLYLYLQNGRDMYVDQELDINRLSDYDVDHIVPQSFLKDDSIDNKVLTRSDKNRGKSDNVPSEEVV  
KKMKNYWRQLLNAKLITQRKFDNLTKAERGGSELDKAGFIK RQLVETRQITKHVAQILDSRMNTKYDENDKLIREVKVI  
TLKSKLVSDFRKDFQFYKVRINNYHHAHDAYLNAVVG TALIKKYPKLESEFVYGDYKVVYDVRKMI AKSEQEIGKATAKYF  
FYSNIMNFFKTEITLANGEIRKPLIETNGETGEIVWDKGRDFATVRKVL SMPQVNIVKKTEVQTGGFSKESILPKRNSDK  
LIARKKDWDPKKGFDSPVAYSVLVVAKEVGKSKKLKSVKELLGITIMERS SFEKNPIDFLEAKGYKEVKKDLIILPKY  
SLFELENGRKRMLASAGELQKGNELALPSKYVNFLYLASHYEK LKGS PEDNEQKQLFVEQHKHYLDEIIEQISEFSKRVILA  
DANLDKVL SAYNKH RDKPIREQAENIIHLFTLNLGAPAAFKYFDTTIDRKRYTSTKEVLDATLIHQ SITGLYETRIDLSQLG  
GDKRPAATK KAGQAKKK

R27A xTevCas9

MKSGIYQIKNTLNNKVYVGS AKDFEKA WKRHFKDLEKGCHSSIKLQRSFNKHGNVFECSILEEIPYEKDLIERENFWIKE  
LNSKINGYNIADATFGDTCSTHPLKEEIIKKRSETVAKAKMLKLGPDGRKALYSKPGSKNGRWNPEHFKFCKGVRIQTS  
YTCSKCRNGGSGGSDKKYSIGLDIGTNSVGWAVITDEYKVP SKFKVLGNTDRHSIKKNLIGALLFDSGETAEATRLKRTA  
RRRYTRRKNRICYLQEIFSNEMAKVDDSFHRL EESFLVEEDKKHERHPIFGNIVDEVAYHEKYPTIYHLRKKLVDSTDKAD  
LRLIYLALAHMIKFRGHFLIEGDLNPDNSDVKLFIQLVQTYNQLFEENPINASGVDAKAILSARLSKSRRENLI AQLPGE  
KKNGLFGNLI ALSGLTPNFKSNFDLAEDAKLQLSKDTYDDDLDNLLAQIGDQYADLFLAAKNLSDAILSDILRVNTEITK

APLSASMIKRYDEHHQDLTLLKALVRQQLEPKYKEIFFDQSKNGYAGYIDGGASQEEFYKFIKPILEKMDGTEELLVKLNR  
EDLLRKQRTFDNGSIPHQIHLGELHAILRRQEDFYFPLKDNREKIEKILTRIPYYVGPLARGNSRFAWMTRKSEETITPW  
NFEEVVDKGASAQSFIERMTNFDKPNLNEKVLPHKSHLLYEFYFTVYNELTKVKYVTEGMRKPAFLSGEQKKAIVDLLFKTN  
RKVTVKQLKEDYFKKIECFDSVEISGVEDRFNASLGTYHDLLKIIKDKDFLDNEENEDILEDIVLTLTLFEDREMIEERLKTYA  
HLFDDKVMKQLKRRRYTGWGRLSRKLINGIRDKQSGKTILDFLKSDGFANRNFMQLIHDDSLTFKEDIQKAQVSGQGD  
SLHEHIANLAGSPAIKKILQTVKVVDELVKVMGRHKPENIVIAMARENQTTQKGQKNSRERMKRIEEGKELGSQILKE  
HPVENTQLQNEKLYLYLQNGRDMYVDQELDINRLSDYDVDHIVPQSFLKDDSIDNKVLTRSDKNRKGSDNVPSEEVV  
KKMKNYWRQLLNAKLITQRKFDNLTKAERGGLSELDKAGFIKRQLVETRQITKHVAQILDSRMNTKYDENDKLIREVKVI  
TLKSKLVSDFRKDFQFYKVRINNYHHAHDAYLNAVVGTAALIKKYPKLESEFVYGDYKVDVRKMIKSEQEIGKATAKYF  
FYSNIMNFFKTEITLANGEIRKRPLIETNGETGEIVWDKGRDFATVRKVLSPQVNIKKTEVQTGGFSKESILPKRNSDK  
LIARKKDWDPKKYGGFDSPTVAYSVLVAKVEKGSKLLKSVKELLGITIMERSSEKPNIDFLEAKGYKEVKKDLIILPKY  
SLFELENGRKRMLASAGELQKGNELALPSKYVNFYLYLASHYEKLGSPEDNEQKQLFVEQHKHYLDEIIEQISEFSKRVILA  
DANLDKVL SAYNKH RDKPIREQAENIIHLFTLTNLGAPAAFKYFDTTIDRKRYTSTKEVL DATLIHQ SITGLYETRIDLSQLG  
GDKRPAATKKAGQAKKKK

V117F (V) TevCas9

MGKSGIYQIKNTLNNKVYVGSRKDFEKAWKRHF KDLEKGCHSSIKLQRSFNKHGNVFECSILEEIPYEKDLIERENFWIKE  
LNSKINGYNIADATFGDTCSTHPLKEEIIKKRSETFKAKMLKLGPDGRKALYSKPGSKNGRWNPETHKFCCKGVRIQTSAY  
TCSKCRNGGSGGSDKKYSIGLDIGTNSVGWAVITDEYKVP SKFKVLGNTDRHSIKKNLIGALLFDSGETAEATRLKRTAR  
RRYTRRNRYCYLQEIFSNEMAKVDDSFHRLEESFLVEEDKKHERHPIFGNIVDEVAYHEKYPTIYHLRKKLVDSTDKADL  
RLIYLALAHMIKFRGHFLIEGDLNPDNSVDKLFIQLVQTYNQLFEENPINASGVDAKAILSARLSKSRRENLIAQLPGEK  
KNGLFGNLI ALSGLTPNFKSNFDLAEDAKLQLSKDTYDDDLNLLAQIGDQYADLFLAAKNLSDAILLSDILRVNTEITKA  
PLSASMIKRYDEHHQDLTLLKALVRQQLEPKYKEIFFDQSKNGYAGYIDGGASQEEFYKFIKPILEKMDGTEELLVKLNR  
DLLRKQRTFDNGSIPHQIHLGELHAILRRQEDFYFPLKDNREKIEKILTRIPYYVGPLARGNSRFAWMTRKSEETITPWN  
FEEVVDKGASAQSFIERMTNFDKPNLNEKVLPHKSHLLYEFYFTVYNELTKVKYVTEGMRKPAFLSGEQKKAIVDLLFKTNR  
KVTVKQLKEDYFKKIECFDSVEISGVEDRFNASLGTYHDLLKIIKDKDFLDNEENEDILEDIVLTLTLFEDREMIEERLKTYAH  
LFDDKVMKQLKRRRYTGWGRLSRKLINGIRDKQSGKTILDFLKSDGFANRNFMQLIHDDSLTFKEDIQKAQVSGQGD  
SLHEHIANLAGSPAIKKILQTVKVVDELVKVMGRHKPENIVIAMARENQTTQKGQKNSRERMKRIEEGKELGSQILKEHP  
VENTQLQNEKLYLYLQNGRDMYVDQELDINRLSDYDVDHIVPQSFLKDDSIDNKVLTRSDKNRKGSDNVPSEEVVKK  
MKNYWRQLLNAKLITQRKFDNLTKAERGGLSELDKAGFIKRQLVETRQITKHVAQILDSRMNTKYDENDKLIREVKVITL  
KSKLVSDFRKDFQFYKVRINNYHHAHDAYLNAVVGTAALIKKYPKLESEFVYGDYKVDVRKMIKSEQEIGKATAKYFFY  
SNIMNFFKTEITLANGEIRKRPLIETNGETGEIVWDKGRDFATVRKVLSPQVNIKKTEVQTGGFSKESILPKRNSDKLI  
ARKKDWDPKKYGGFDSPTVAYSVLVAKVEKGSKLLKSVKELLGITIMERSSEKPNIDFLEAKGYKEVKKDLIILPKYSL  
FELENGRKRMLASAGELQKGNELALPSKYVNFYLYLASHYEKLGSPEDNEQKQLFVEQHKHYLDEIIEQISEFSKRVILAD  
ANLDKVL SAYNKH RDKPIREQAENIIHLFTLTNLGAPAAFKYFDTTIDRKRYTSTKEVL DATLIHQ SITGLYETRIDLSQLGG  
DKRPAATKKAGQAKKKK

V117F/K135N (VK) TevCas9

MGKSGIYQIKNTLNNKVYVGSRKDFEKAWKRHF KDLEKGCHSSIKLQRSFNKHGNVFECSILEEIPYEKDLIERENFWIKE  
LNSKINGYNIADATFGDTCSTHPLKEEIIKKRSETFKAKMLKLGPDGRKALYSNPGSKNGRWNPETHKFCCKGVRIQTS  
YTCSKCRNGGSGGSDKKYSIGLDIGTNSVGWAVITDEYKVP SKFKVLGNTDRHSIKKNLIGALLFDSGETAEATRLKRTA  
RRYTRRNRYCYLQEIFSNEMAKVDDSFHRLEESFLVEEDKKHERHPIFGNIVDEVAYHEKYPTIYHLRKKLVDSTDKAD  
RLIYLALAHMIKFRGHFLIEGDLNPDNSVDKLFIQLVQTYNQLFEENPINASGVDAKAILSARLSKSRRENLIAQLPGE  
KNGLFGNLI ALSGLTPNFKSNFDLAEDAKLQLSKDTYDDDLNLLAQIGDQYADLFLAAKNLSDAILLSDILRVNTEITK  
APLSASMIKRYDEHHQDLTLLKALVRQQLEPKYKEIFFDQSKNGYAGYIDGGASQEEFYKFIKPILEKMDGTEELLVKLNR  
EDLLRKQRTFDNGSIPHQIHLGELHAILRRQEDFYFPLKDNREKIEKILTRIPYYVGPLARGNSRFAWMTRKSEETITPW  
NFEEVVDKGASAQSFIERMTNFDKPNLNEKVLPHKSHLLYEFYFTVYNELTKVKYVTEGMRKPAFLSGEQKKAIVDLLFKTN  
NFEEVVDKGASAQSFIERMTNFDKPNLNEKVLPHKSHLLYEFYFTVYNELTKVKYVTEGMRKPAFLSGEQKKAIVDLLFKTN

RKVTVKQLKEDYFKKIECFDSVEISGVEDRFNASLGTYHDLLKIIKDKDFLDNEENEDILEDIVLTLTLFEDREMIEERLKTYA  
HLFDDKVMKQLKRRRYTGWGRLSRKLINGIRDKQSGKTILDFLKSDGFANRNFMQLIHDDSITFKEDIQKAQVSGQGD  
SLHEHIANLAGSPAIKKILQTVKVVDELVKVMGRHKPENIVIAMARENQTTQKGQKNSRERMKRIIEGKELGSQILKE  
HPVENTQLQNEKLYLYLQNGRDMYVDQELDINRLSDYDVDHIVPQSFLKDDSIDNKVLTRSDKNRGKSDNVPSEEVV  
KKMKNYWRQLLNAKLITQRKFDNLTKAERGGSELDKAGFIKRLVETRQITKHVAQILDSRMNTKYDENDKLIREVKVI  
TLKSKLVSDFRKDFQFYKVRINNYHHAHDAYLNAVVGTAIIKYPKLESEFVYGDYKVDVRKMIKSEQEIGKATAKYF  
FYSNIMNFFKTEITLANGEIRKRPLIETNGETGEIVWDKGRDFATVRKVLVSMQPQVNIKKTEVQTGGFSKESILPKRNSDK  
LIARKKDWDPKKYGGFDSPTVAYSVLVAKVEKGSKKLKSVKELLGITIMERSSEKPNIDFLEAKGYKEVKKDLIIKLPKY  
SLFELENGRKRMLASAGELQKGNELALPSKYVNFLYLASHYEKLGSPEDNEQKQLFVEQHKHYLDEIIEQISEFSKRVILA  
DANLDKVL SAYNKHRDKPIREQAENIIHLFTLTNLGAPAAFKYFDTTIDRKRYTSTKEVL DATLIHQ SITGLYETRIDLSQLG  
GDKRPAATKKAGQAKKKK

V117F/K135R/N140S (VKN) TevCas9

MGKSGIYQIKNTLNNKVYVGSRKDFEKAWKRHFKDLEKGCHSSIKLQRSFNKHGNVFECSILEEIPYEKDLIIERENFWIKE  
LNSKINGYNIADATFGDTCSTHPLKEEIIKRSSETFKAKMLKLGPDGRKALYSRPGSKSGRWNPETHKFCCKGVRIQTSAY  
TCSKCRNGSGGSDKKYSIGLDIGTNSVGVAVITDEYKVPSSKFKVLGNTDRHSIKKNLIGALLFDSGETAEATRLKRTAR  
RRYTRRKNRICYLQEIFSNEMAKVDDSFHRLSEESFLVEEDKKHERHPIFGNIVDEVAYHEKYPTIYHLRKKLV DSTDKADL  
RLIYLALAHMIKFRGHFLIEGLNPDNSDVKLFIQLVQTYNQLFEENPINASGVDAKAILSARLSKSRRENLIAQLPGEK  
KNGLFGNLIASLGLTPNFKSNFDLAEDAQLQSKDQYDDDLNDLLAQIGDQYADLFLAAKNLSDAILLSILRVNTEITKA  
PLSASMIKRYDEHHQDLTLKALVRQQLPEKYKEIFFDQSKNGYAGYIDGGASQEEFYKFIKPILEKMDGTEELLVKNRE  
DLLRKQRTFDNGSIPHQIHLGELHAILRRQEDFYPLKDNREKIEKILTRIPYVVGPLARGNSRFAMTRKSEETIPWN  
FEEVVDKGASQSFIERMTNFDKNLPNEKVLPKHSLLEYFTVYNELTKVKYVTEGMRKPAFLSGEQKKAIVDLLFKTNR  
KVTVKQLKEDYFKKIECFDSVEISGVEDRFNASLGTYHDLLKIIKDKDFLDNEENEDILEDIVLTLTLFEDREMIEERLKTYA  
LFDDKVMKQLKRRRYTGWGRLSRKLINGIRDKQSGKTILDFLKSDGFANRNFMQLIHDDSITFKEDIQKAQVSGQGD  
HEHIANLAGSPAIKKILQTVKVVDELVKVMGRHKPENIVIAMARENQTTQKGQKNSRERMKRIIEGKELGSQILKEHP  
VENTQLQNEKLYLYLQNGRDMYVDQELDINRLSDYDVDHIVPQSFLKDDSIDNKVLTRSDKNRGKSDNVPSEEVVKK  
MKNYWRQLLNAKLITQRKFDNLTKAERGGSELDKAGFIKRLVETRQITKHVAQILDSRMNTKYDENDKLIREVKVITL  
KSKLVSDFRKDFQFYKVRINNYHHAHDAYLNAVVGTAIIKYPKLESEFVYGDYKVDVRKMIKSEQEIGKATAKYFFY  
SNIMNFFKTEITLANGEIRKRPLIETNGETGEIVWDKGRDFATVRKVLVSMQPQVNIKKTEVQTGGFSKESILPKRNSDKLI  
ARKKDWDPKKYGGFDSPTVAYSVLVAKVEKGSKKLKSVKELLGITIMERSSEKPNIDFLEAKGYKEVKKDLIIKLPKYSL  
FELENGRKRMLASAGELQKGNELALPSKYVNFLYLASHYEKLGSPEDNEQKQLFVEQHKHYLDEIIEQISEFSKRVILAD  
ANLDKVL SAYNKHRDKPIREQAENIIHLFTLTNLGAPAAFKYFDTTIDRKRYTSTKEVL DATLIHQ SITGLYETRIDLSQLGG  
DKRPAATKKAGQAKKKK
